# Supplementary material
Source: PubMed Central journal article supplement (PMC3581380)
Supplement: supp_M112.445668_jbc.M112.445668-1.pdf [file supp_M112.445668_jbc.M112.445668-1.pdf]

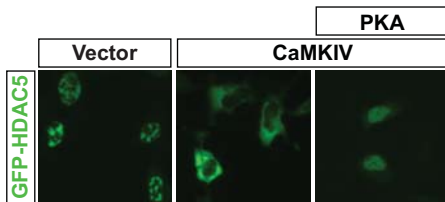

### Figure S1. PKA reverses CaMKIV-mediated nuclear export of HDAC5

HEK293 cells were transiently transfected with an GFP-HDAC5 expression plasmid together with an empty vector, or with expression plasmids for CaMKIV and/or PKA as indicated.



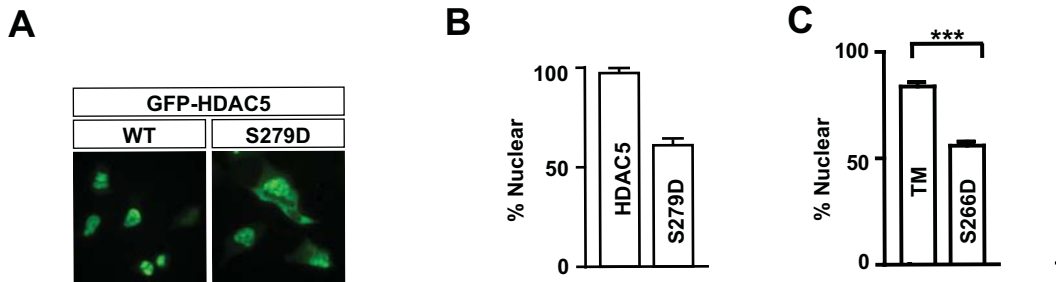

### Figure S3. Subcellular localization of the S279D and S266D mutants

- A) Representative fluorescence microscopy images of GFP-HDAC5 WT and the mutant S279D after transient transfection in HEK293 cells.
- B) Quantification of GFP-HDAC5 and GFP-S279D subcellular localization post-transient transfection in C2C12 cells. At least 100 cells were counted for each condition over 2 independent experiments. Data are presented as mean +/- standard deviation (error bars).
- C) Quantification of GFP-HDAC4 TM and GFP-TM/S266D subcellular localization post-transient transfection in HEK293 cells. Data are presented as mean +/- standard deviation (error bars). \*\*\*,  $p=0.0006$ .

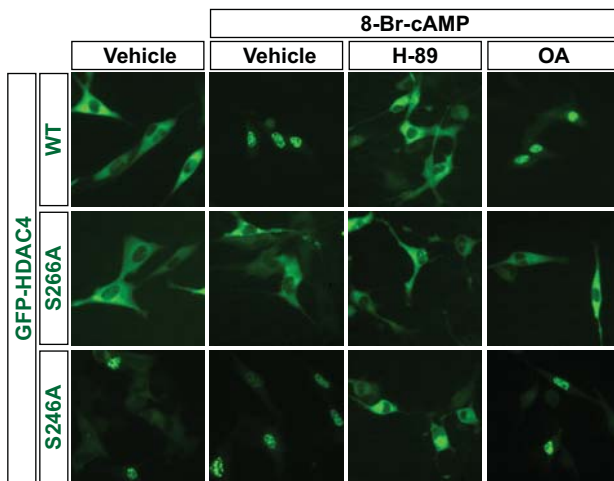

**Figure S4. H-89 treatment inhibits cAMP-mediated nuclear localization of HDAC4**

C2C12 cells were transiently transfected with expression plasmids for GFP-HDAC4, -S266A, or -S246A. Cells were pre-treated with vehicle (H<sub>2</sub>O), the PKA inhibitor H-89 (10  $\mu$ M), or the PP2A inhibitor okadaic acid (OA, 100 nM) for 1 h, followed by treatment with vehicle (H<sub>2</sub>O) or 1 mM 8-Br-cAMP for 30 min. Subcellular localization of the GFP-HDAC4 constructs was monitored by green fluorescence microscopy.

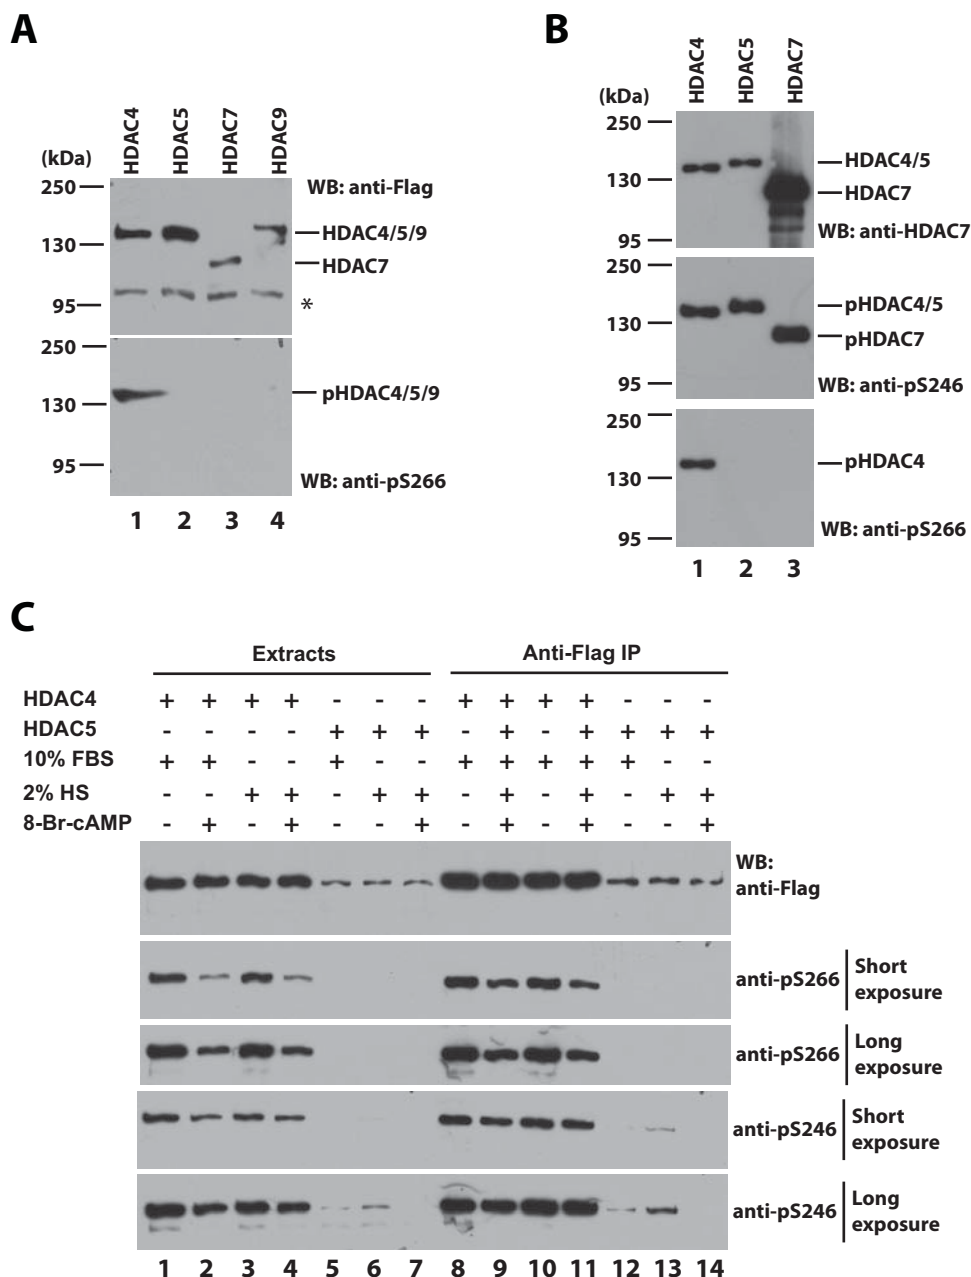

**Figure S5. Differential phosphorylation of HDAC4, 5 and 9 at the conserved motif**

A) HEK293 cells were transiently transfected with Flag-HDAC4, 5, 7 and 9 expression plasmids as indicated. Soluble extracts were analyzed by Western blotting with anti-Flag or phospho-S266 specific antibody. \*, non-specific bands.

B) Same as A) except that only HDAC4, 5 and 7 were analyzed. For immunoblotting, anti-HDAC7, anti-phospho S246 and anti-phospho S266 antibodies were used. The anti-HDAC7 antibody crossreacts with HDAC4 and HDAC5.

C) C2C12 cells were transiently transfected with Flag-HDAC4 and -HDAC5 expression plasmids for analysis as in Fig. 5C. The blots in Fig. 6C are part of the blots presented in this supplemental figure (lanes 1-4, different exposure). Note that due to the predominantly nuclear localization of HDAC5, the phosphorylation levels remain low or undetectable. FBS, fetal bovine serum; HS, horse serum.

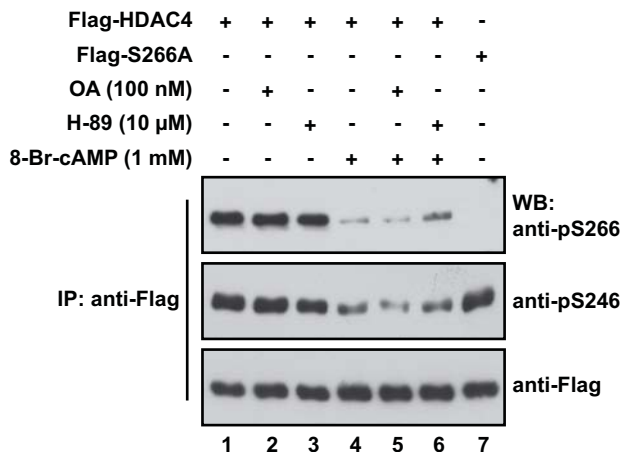

### Figure S6. Effect of PP2A or PKA inhibition on S266 phosphorylation

C2C12 cells were transiently transfected with an expression plasmid for Flag-tagged wild-type HDAC4 or mutant S266A. The following day, cells were pre-treated with 100 nM okadaic acid (OA) or 10  $\mu$ M H-89 for 1 h, followed by treatment with vehicle (H<sub>2</sub>O) or 1 mM 8-Br-cAMP for 30 min as indicated. Cells were harvested and Flag-tagged proteins were immunoprecipitated on M2 agarose beads. Immunoblotting was performed by use of antibodies as indicated.

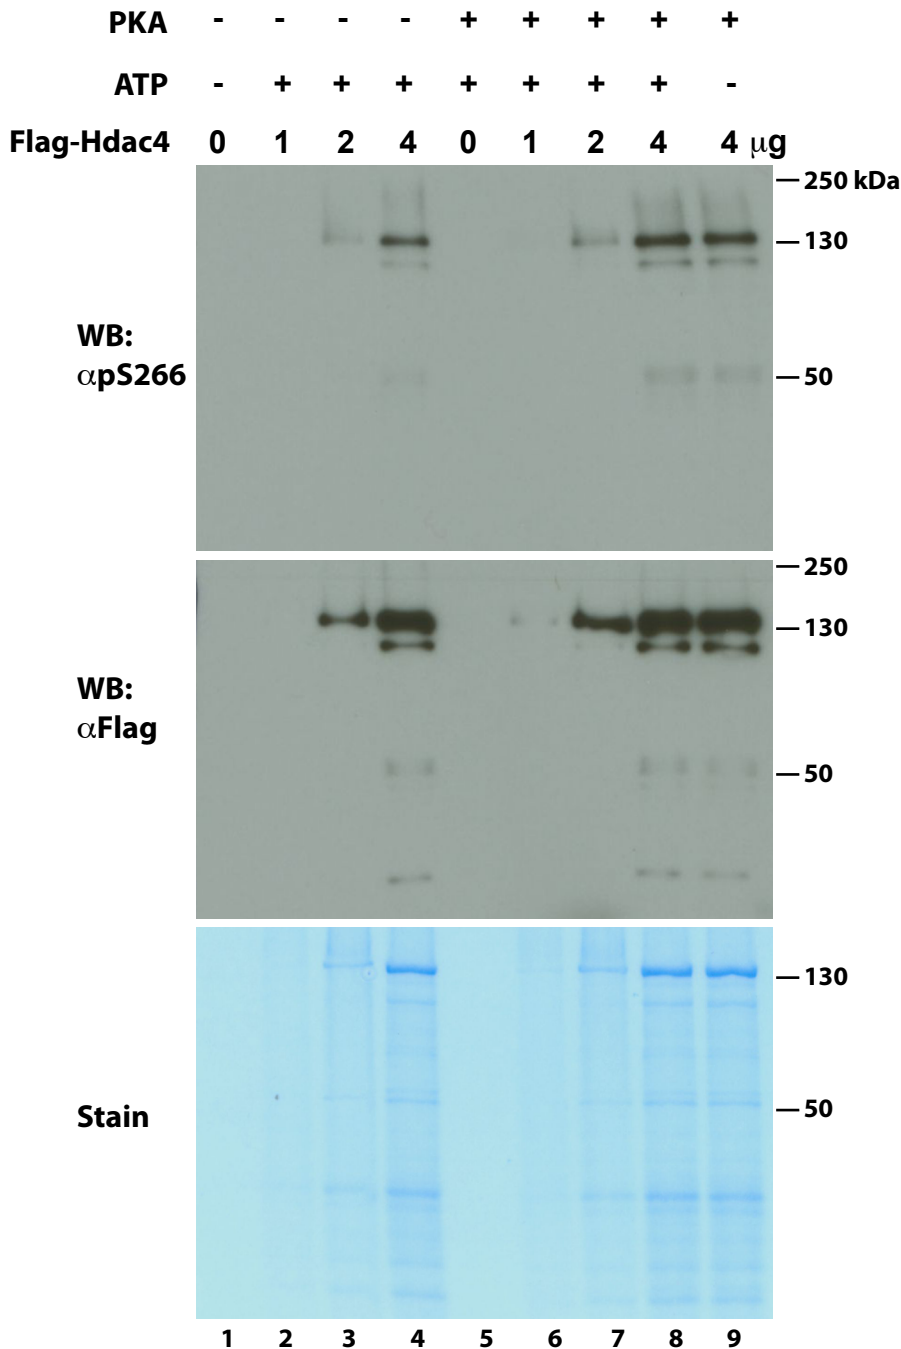

**Figure S7. Phosphorylation of HDAC4 by PKA *in vitro*.**

Different amounts of Flag-HDAC4, expressed in Sf9 cells and affinity-purified from the soluble extracts, were subject to phosphorylation assays in the presence or absence of the PKA catalytic subunit *in vitro*, with or without ATP, as specified. A third of each reaction mixture was stained with Colloidal Coomassie blue (*bottom*) and the remaining mixture was used for immunoblotting with anti-phospho-S266 (*top*) or anti-Flag antibody (*middle*). The residual signals detected by the anti-phospho-S266 antibody (lanes 2-4) could be due to phosphorylation already occurred in Sf9 cells. The PKA catalytic subunit used for the particular experiment shown here was from Calbiochem and has a specific activity of 20 units/ng, the amount of 50 ng is equivalent to 1,000 units per reaction. Even in the presence of this excessive amount, PKA had minimal effects on ATP-dependent phosphorylation, so PKA did not appear to phosphorylate HDAC4. We also tested a smaller amount of a PKA catalytic subunit from Sigma and did not find any phosphorylation either (data not shown).

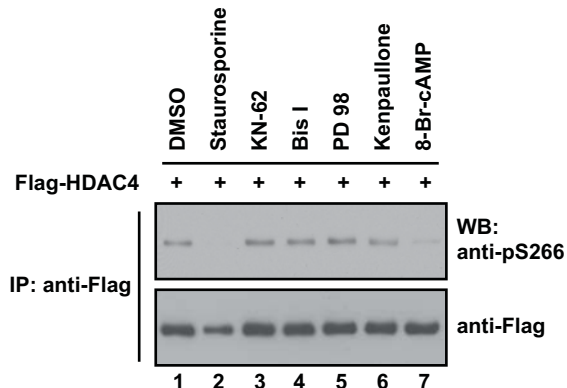

### Figure S8. Effect of various kinase inhibitors on S266 phosphorylation

C2C12 cells were transiently transfected with an expression plasmid for Flag-HDAC4. The following day, cells were treated with either DMSO, 8-Br-cAMP, or inhibitors of the following kinases: general S/T kinases (Staurosporine, 1  $\mu$ M), CaMKs (KN-62, 10  $\mu$ M), PKC (Bis I, 10  $\mu$ M), MEK/ERK (PD 98059, 1  $\mu$ M) and GSK-3 (Kenpaullone, 5  $\mu$ M). Cells were harvested for extraction and Flag-HDAC4 was immunoprecipitated on M2 agarose beads. Immunoblotting was performed with the anti-Flag antibody or the phospho-S266 specific antibody.
